# Supplementary material for: Psychophysiology of facial emotion recognition in psychopathy dimensions and oxytocin’s role: A scoping review
Source: PLOS journal article supplement (doi:10.1371/journal.pone.0327764), 2025-07-30
Supplement: S3 (10.1371/journal.pone.0327764.s003) [file journal.pone.0327764.s003.pdf]

**S1 Table. Search queries per theme section of the scoping review**

| <b>Psychopathy, oxytocin and emotion recognition</b>                                                                                                                      |
|---------------------------------------------------------------------------------------------------------------------------------------------------------------------------|
| (psychopathy OR psychopathic) AND oxytocin AND (facial OR face) AND (emotion recognition OR passive viewing) AND adult                                                    |
| <b>Psychopathy and emotion recognition</b>                                                                                                                                |
| (psychopathy OR psychopathic) AND (facial OR face) AND (emotion recognition OR passive viewing) AND adult                                                                 |
| (psychopathy OR psychopathic) AND (facial OR face) AND (emotion recognition OR passive viewing) AND adult AND (fMRI OR “functional magnetic resonance” OR neuroimaging)   |
| (psychopathy OR psychopathic) AND (facial OR face) AND (emotion recognition OR passive viewing) AND adult AND (EEG OR electroencephalography OR ERP OR evoked potentials) |
| (psychopathy OR psychopathic) AND (facial OR face) AND (emotion recognition OR passive viewing) AND adult AND (“eye-tracking” OR eye-gaze OR saccade)                     |
| (psychopathy OR psychopathic) AND (facial OR face) AND (emotion recognition OR passive viewing) AND adult AND pupil*                                                      |
| <b>Oxytocin and emotion recognition</b>                                                                                                                                   |
| oxytocin AND (facial OR face) AND (emotion recognition OR passive viewing) AND adult                                                                                      |
| oxytocin AND (facial OR face) AND (emotion recognition OR passive viewing) AND adult AND (fMRI OR “functional magnetic resonance” OR neuroimaging)                        |
| oxytocin AND (facial OR face) AND (emotion recognition OR passive viewing) AND adult AND (EEG OR electroencephalography OR ERP OR evoked potentials)                      |
| oxytocin AND (facial OR face) AND (emotion recognition OR passive viewing) AND adult AND (“eye-tracking” OR eye-gaze OR saccade)                                          |
| oxytocin AND (facial OR face) AND (emotion recognition OR passive viewing) AND adult AND pupil*                                                                           |

*Note.* It was selected the option “All fields” on the search builder of the databases.
