# Supplementary material for: Psychophysiology of facial emotion recognition in psychopathy dimensions and oxytocin’s role: A scoping review
Source: PLOS journal article supplement (doi:10.1371/journal.pone.0327764), 2025-07-30
Supplement: S5 (10.1371/journal.pone.0327764.s005) [file journal.pone.0327764.s005.pdf]

**S3 Table. Studies on the association of psychopathy and facial emotion recognition performance and functional central and peripheral nervous system correlates**

| Study                             | Sample                                                                                     | Psychopathy measure/scores               | Task/Emotional stimuli                                                                                                                                          | Association with psychopathy                                                                                                                |
|-----------------------------------|--------------------------------------------------------------------------------------------|------------------------------------------|-----------------------------------------------------------------------------------------------------------------------------------------------------------------|---------------------------------------------------------------------------------------------------------------------------------------------|
| <b>Behavior (accuracy)</b>        |                                                                                            |                                          |                                                                                                                                                                 |                                                                                                                                             |
| Beussink et al., 2020             | N total = 145 M offenders;<br>age = 26.26±6.86                                             | PCL-R total and subscales (whole sample) | Explicit recognition of emotions:<br>Matching of emotions (angry, disgustful, sad, surprised, fearful and happy faces)                                          | ↑ accuracy for fearful faces (Affective facet)<br>↓ accuracy for happy faces (Lifestyle facet)                                              |
| Brislin & Patrick, 2019           | N total = 127; M (n = 62); F (n = 65); age = 19.5±3.7                                      | TriPM total and subscales (whole sample) | Explicit recognition of emotions (angry, disgustful, fearful, happy, sad and surprised faces, with different intensities)                                       | ↓ accuracy for middle-intensity fearful faces (Meanness subscale)<br>↓ accuracy for low-intensity disgustful faces (Disinhibition subscale) |
| Contreras-rod r guez et al., 2014 | N=44 M; criminal offenders (n=22; age=39.8±9.2); healthy nonoffenders (n=22; age=40.6±9.5) | PCL-R total and subscales (whole sample) | Implicit emotional face-matching task (happy, fearful and angry faces)                                                                                          | Accuracy: n.s.                                                                                                                              |
| Dargis et al., 2018               | N = 198 M inmates; age = 18-55                                                             | PCL-R total and subscales (whole sample) | Explicit recognition of emotions (happy, sad, angry, fearful, disgustful, and neutral faces) and viewing of emotions (happy, angry, fearful, and neutral faces) | ↓ accuracy for fearful faces (Affective facet)<br>↑ accuracy for fearful faces (Lifestyle facet)                                            |
| Deeley et al., 2006               | N total = 15 M; offenders (n = 6; age = 36.0±9.0); HC (n = 9, age = 27.0±5.0)              | PCL-R total (offenders)                  | Implicit emotion recognition task (fearful, happy and neutral faces)                                                                                            | Accuracy: n.s.                                                                                                                              |

| Study                   | Sample                                                                                                      | Psychopathy measure/scores               | Task/Emotional stimuli                                                                                                                             | Association with psychopathy                                                                                  |
|-------------------------|-------------------------------------------------------------------------------------------------------------|------------------------------------------|----------------------------------------------------------------------------------------------------------------------------------------------------|---------------------------------------------------------------------------------------------------------------|
| Dolan & Fullam, 2006    | N total = 98 M; offenders (n = 49, age = 35.2±10.3); HC (n = 49, age = 35.3±9.1)                            | PCL:SV total and subscales (offenders)   | Explicit recognition of emotions (morphed angry, disgustful, fearful, happy, sad and surprised faces, with different intensities)                  | ↓ accuracy for sad faces (total score)<br>↓ accuracy for happy faces (Antisocial facet)<br>Response time: n.s |
| Dolan & Fullam, 2004    | N total = 109 M; antisocial inmates (n = 89; age = 36.7±9.9); HC (n = 20; age = 33.6±4.9)                   | PCL:SV total (antisocial inmates)        | Explicit recognition of emotions (happy, sad, angry, fearful, surprised, disgustful and distressed faces, with covered or uncovered eyes)          | ↑ accuracy for all emotion expressions (antisocial inmates)                                                   |
| Eisenbarth et al., 2008 | N total = 44 F; forensic patients (n = 28) + community people (n = 16); age = 41.7±11.5                     | PCL-R total (forensic patients)          | Explicit recognition of emotions (anxious, angry, disgustful, happy, neutral, sad and surprised)                                                   | ↓ accuracy for short presentation of sad faces                                                                |
| Faith et al., 2023      | N total = 139 M; inmates; age = 26.3±6.9                                                                    | PCL-R total and subscales (whole sample) | Explicit recognition of emotions (morphed happy, sad, angry, fearful, surprised and disgusted faces)                                               | ↑ response time for angry faces (Antisocial facet)                                                            |
| Faith et al., 2022      | N total = 288 M; inmates; age = 26.7±6.8                                                                    | PCL-R total (whole sample)               | Explicit recognition of emotions (morphed happy, sad, angry, fearful, surprised and disgusted faces)                                               | ↓ accuracy for fearful faces                                                                                  |
| Gehrer et al., 2019     | N total = 36 M; psychopathic (n = 19, age = 40.3±11.1); non-psychopathic offenders (n = 17, age = 37.4±9.0) | PCL-R total (whole sample)               | Explicit recognition of emotions & gender (angry, disgustful, happy, fearful, sad, surprised and neutral faces)                                    | Accuracy: n.s.                                                                                                |
| Gillespie et al., 2019  | N total = 73 M violent offenders; age = 38.7±11.7                                                           | TriPM total and subscales (whole sample) | Explicit recognition of emotions (morphed neutral, angry, disgustful, fearful, happy, sad, and surprised faces with different levels of intensity) | ↓ accuracy for fearful faces<br>↑ accuracy for sad faces                                                      |

| Study                  | Sample                                                                                                              | Psychopathy measure/scores               | Task/Emotional stimuli                                                                                                                                                    | Association with psychopathy                                                                                                                                                        |
|------------------------|---------------------------------------------------------------------------------------------------------------------|------------------------------------------|---------------------------------------------------------------------------------------------------------------------------------------------------------------------------|-------------------------------------------------------------------------------------------------------------------------------------------------------------------------------------|
| Gillespie et al., 2017 | N total = 55 M; violent offenders (n=30; age = 35.1±11.8; community people (n = 25; age = 37.9±18.3                 | TriPM subscales (whole sample)           | Explicit recognition of emotions (morphed angry, disgustful, fearful, happy, sad and surprised faces, with different intensities)                                         | Accuracy: n.s.                                                                                                                                                                      |
| Gillespie et al., 2015 | N = 38 community M; age = 23.2±4.9                                                                                  | LSRP subscales (whole sample)            | Explicit recognition of emotions (morphed angry, disgustful, fearful, happy, sad and surprised faces, with different intensities)                                         | Accuracy: n.s.                                                                                                                                                                      |
| Glass & Newman, 2006   | N total = 111 M; psychopathic inmates (n = 50, age = 32.58±7.08); non-psychopathic inmates (n = 61, age = 32.0±7.0) | PCL-R total score (whole sample)         | Explicit recognition of emotions (angry, fearful, happy and sad faces): Identify condition & Locate condition (congruent with attentional set)                            | ↑ accuracy for fearful faces (Identify condition)                                                                                                                                   |
| Gordon et al., 2004    | N total = 20 community M; age = 23.5±4.1                                                                            | PPI total and subscales (whole sample)   | Explicit recognition of emotions (angry, fearful, sad, and joyful faces)<br>Emotion recognition condition and identity condition (which emotion is vs. who the person is) | Accuracy: n.s.<br>Response time: n.s.                                                                                                                                               |
| Hansen et al., 2008    | N total = 43 M offenders; age = 31.6                                                                                | PCL-R total and subscales (whole sample) | Explicit recognition of emotions (sad, fearful, disgustful, angry, surprised, happy, and neutral)                                                                         | ↑ accuracy for disgustful faces (Lifestyle and Antisocial facets)<br>↓ accuracy for neutral faces (Affective facet)<br>↓ accuracy for female disgustful faces (Interpersonal facet) |

| Study                          | Sample                                                                                                     | Psychopathy measure/scores                 | Task/Emotional stimuli                                                                                                                                                                                                                                | Association with psychopathy                                                                                                                                                                                                                        |
|--------------------------------|------------------------------------------------------------------------------------------------------------|--------------------------------------------|-------------------------------------------------------------------------------------------------------------------------------------------------------------------------------------------------------------------------------------------------------|-----------------------------------------------------------------------------------------------------------------------------------------------------------------------------------------------------------------------------------------------------|
| Igoumenou et al., 2017         | N total = 1353 M ex-inmates; age = 29.9±0.4                                                                | PCL-R total and subscales (whole sample)   | Explicit recognition of emotions (morphed happy, surprised, sad, fearful, angry and disgustful faces, with different intensities)                                                                                                                     | ↑ accuracy for angry faces (Interpersonal facet)<br>↓ accuracy for fearful and disgustful faces (Affective facet)<br>↓ accuracy for surprised faces (Lifestyle facet)<br>↓ accuracy for fearful, disgustful and surprised faces (Antisocial facets) |
| Jusyte & Schönenberg, 2017     | N total = 69 M; violent offenders (n = 34; age = 37.8±10.84); HC (n = 35; age = 30.5±11.8)                 | SRP-III total and subscales (whole sample) | Implicit recognition of emotions<br>Experiment 1: Emotion sensitivity (angry, happy, fearful and neutral faces, with different intensities);<br>Experiment 2: Ambiguous expressions task (blended happy-fearful, happy-angry and fearful-angry faces) | Experiment 1: n.s.<br>Experiment 2: ↓ accuracy for ambiguous fearful faces (violent offenders' total score, Callous Affect and Antisocial Behavior subscales)                                                                                       |
| Khvatskaya & Lenzenweger, 2016 | N total = 47 community; M (n = 16); F (n = 31); age = 18.9±1.6                                             | PPI-R total (whole sample)                 | Explicit recognition of emotions (angry, contempted, disgustful, fearful, joyful, sad, surprised, or neutral faces)                                                                                                                                   | n.s.                                                                                                                                                                                                                                                |
| Kosson et al., 2002            | N total = 67 M; psychopath inmates (n = 34, age = 27.0±2.8); non-psychopath inmates (n = 33, age=27.0±6.5) | PCL-R total (whole sample)                 | Explicit recognition of emotions (happy, sad, angry, fearful and disgustful)                                                                                                                                                                          | ↓ recognition accuracy for disgustful faces                                                                                                                                                                                                         |
| Kranefeld & Blickle, 2022      | N total = 477 community; M (n = 305); F (n = 272); age = 40.3±12.3                                         | TriPM, PPI-R and LSRP total and            | Implicit emotional face-matching task                                                                                                                                                                                                                 | Accuracy: n.s.                                                                                                                                                                                                                                      |

| Study                | Sample                                                                                                                                   | Psychopathy measure/scores                               | Task/Emotional stimuli                                                                                                                                          | Association with psychopathy                                                  |
|----------------------|------------------------------------------------------------------------------------------------------------------------------------------|----------------------------------------------------------|-----------------------------------------------------------------------------------------------------------------------------------------------------------------|-------------------------------------------------------------------------------|
|                      |                                                                                                                                          | subscales (whole sample)                                 |                                                                                                                                                                 |                                                                               |
| Kuin et al., 2017    | N total = 117 M; violent offenders (n=71; age = 36.6±11.8); nonviolent offenders (n = 14; age = 37.4±10.4); HC (n = 32; age = 41.8±11.2) | PPI-R total (violent offenders and nonviolent offenders) | Explicit recognition of emotions (morphed sequences from unambiguous happy to unambiguous angry faces)                                                          | n.s.                                                                          |
| Künecke et al., 2018 | N total = 266 M; inmates (n = 179) and HC (n = 87); age = 35.9±11.0                                                                      | PCL:SV total (whole sample)                              | Explicit recognition of emotions (morphed dynamic angry, happy, sad and neutral faces)                                                                          | ↑ response time for neutral faces                                             |
| Mier et al., 2014    | N total = 29 M; inmates (n = 11, age = 44.6±9.0); HC (n = 18, age = 44.0±10.4)                                                           | PCL-R total (inmates); PPI-R total (HC)                  | Explicit recognition of emotions (happy, angry, fearful and neutral faces):<br>Affective Theory of Mind (ToM),<br>Emotion recognition & Neutral face conditions | Accuracy: n.s.<br>Response time: n.s                                          |
| Mowle et al., 2019   | N total = 110 community; M (n = 36); F (n = 74); age 18-19                                                                               | TriPM total and subscales (whole sample)                 | Explicit recognition of emotions (fearful, happy, sad, angry, surprised, calm, neutral, and disgustful faces)                                                   | ↓ accuracy for fearful faces (Meanness subscale in high traits)               |
| Munro et al., 2007   | N total = 30 M; violent offenders (n = 15, age = 45.9±3.5); HC (n = 15, age = 46.6±1.8)                                                  | PCL-R total (violent offenders)                          | Explicit emotion recognition: Face flanker task (angry and fearful faces) and letter flanker task                                                               | Response time: n.s.<br>↓ fearful-face flanker accuracy (in violent offenders) |

| Study                       | Sample                                                                                                                                         | Psychopathy measure/scores               | Task/Emotional stimuli                                                                                                                                                                                                                    | Association with psychopathy                                                                                                                                                                                                                 |
|-----------------------------|------------------------------------------------------------------------------------------------------------------------------------------------|------------------------------------------|-------------------------------------------------------------------------------------------------------------------------------------------------------------------------------------------------------------------------------------------|----------------------------------------------------------------------------------------------------------------------------------------------------------------------------------------------------------------------------------------------|
| Olderbak et al., 2018       | N total = 339 M; forensic patients + inmates (n = 226) HC group (n = 113); age = 18-65                                                         | PCL:SV total (whole sample)              | Explicit recognition of emotions (angry, disgustful, fearful, happy, sad and surprised faces):<br>Task 1: Different intensity from upright and inverted dynamic faces;<br>Task 2: Composite faces;<br>Task 3: Facially expressed emotions | Task 1: ↓ accuracy for upright inverted disgustful, fearful, happy and surprised faces (forensic)<br>Task 2: ↓ accuracy for happy expressions in composite (forensic)<br>Task 3: ↓ accuracy for angry faces in inmates and happy (community) |
| Oliver et al., 2015         | N total = 40 community; M (n = 16); F (n = 24); age = 21.6±3.7                                                                                 | PPI-R total and subscales (whole sample) | Implicit recognition of emotions:<br>Continuous flash suppression/presentation (disgustful, fearful and neutral faces); Objective index (emotion localization) & Subjective index (confidence rating)                                     | ↓ accuracy for fearful faces (Objective index, Coldheartedness subscale)                                                                                                                                                                     |
| Pera-Guardiola et al., 2016 | N total = 39 M; criminal offenders (n = 19; age = 39.2±8.9); healthy non-offenders (n = 20; age = 40.6±9.9)                                    | PCL-R total and subscales (whole sample) | Explicit facial emotion expression recognition task (gradually morphed happy, surprised, fearful, sad, disgustful and angry faces)                                                                                                        | ↓ accuracy for sad, happy and fearful faces<br>↑ accuracy for sad faces and fearful faces (Antisocial facet)                                                                                                                                 |
| Pham & Philippot, 2010      | N total = 68 M; psychopathic inmates (n = 20, age = 34.0±10.1); non-psychopathic inmates (n = 23, age = 34.6±8.8); HC (n = 25, age = 35.4±7.9) | PCL-R total and subscales (inmates)      | Explicit recognition of emotions (morphed happy, angry, sad, fearful, or disgustful faces, varied in intensity)                                                                                                                           | ↓ accuracy for happy, angry and disgustful faces                                                                                                                                                                                             |

| Study                             | Sample                                                                                                                                                            | Psychopathy measure/scores                    | Task/Emotional stimuli                                                                                                    | Association with psychopathy                                                                                                                                                                    |
|-----------------------------------|-------------------------------------------------------------------------------------------------------------------------------------------------------------------|-----------------------------------------------|---------------------------------------------------------------------------------------------------------------------------|-------------------------------------------------------------------------------------------------------------------------------------------------------------------------------------------------|
| Philipp-Wiegmann et al., 2017     | N = 70 M; reactive violent offenders (n = 17, age = 34.9±14.6); proactive violent offenders (n = 24, age = 34.0±14.5); community people (n = 29, age = 31.6±12.3) | PCL:SV total (whole sample)                   | Explicit recognition of emotions (angry, fearful, surprised, sad, happy, and disgustful)                                  | ↓ accuracy overall (both violent offenders' groups)                                                                                                                                             |
| Schönenberg & Jusyte, 2014        | N total = 110 M; violent offenders (n = 55; age = 33.4±9.8); HC (n = 55; age = 30.4±10.2)                                                                         | PPI-R total and subscales (violent offenders) | Implicit recognition of emotions: Ambivalence task (morphed sequences happy–fearful, happy–angry and fearful–angry faces) | n.s.                                                                                                                                                                                            |
| <b>fMRI</b>                       |                                                                                                                                                                   |                                               |                                                                                                                           |                                                                                                                                                                                                 |
| Carré et al., 2013                | N total = 200; M (n = 83); F (n = 117); community; age = 19.7±1.3                                                                                                 | SRP-SF subscales (whole sample)               | Implicit emotion perceptual face-matching task (fearful, angry, surprised, and neutral faces)                             | ↓ R dorsal AMY to fearful faces (Interpersonal facet)<br>↑ R dorsal AMY to angry faces (Lifestyle facet)                                                                                        |
| Contreras-rod r guez et al., 2014 | N = 44 M; criminal offenders (n = 22; age = 39.8±9.2); healthy nonoffenders (n = 22; age = 40.6±9.5)                                                              | PCL-R total and subscales (whole sample)      | Implicit emotional face-matching task (happy, fearful and angry faces)                                                    | ↑ frontal cortex for all emotions (F1)<br>↓ frontoparietal cortex, visual areas, and diencephalic–mesencephalic structures for all emotions (F2)<br>Connectivity: n.s. (total score, F1 and F2) |
| Decety et al., 2014               | N total = 80 M inmates; age = 18-50                                                                                                                               | PCL-R total and subscales (whole sample)      | Implicit recognition of dynamic emotions (fearful, sad, happy, and painful faces)                                         | F1 and 2: ↓ bilateral FG, R IFG, R OFC, R dmPFC, L inferior temporal pole, and bilateral middle frontal gyrus for happy; ↓ bilateral middle occipital                                           |

| Study | Sample | Psychopathy<br>measure/scores | Task/Emotional stimuli | Association with psychopathy                                                                                                                                                                                                                                                                                                                                                                                                                                                                                                                                                                                                                                                                                                                                                                                                         |
|-------|--------|-------------------------------|------------------------|--------------------------------------------------------------------------------------------------------------------------------------------------------------------------------------------------------------------------------------------------------------------------------------------------------------------------------------------------------------------------------------------------------------------------------------------------------------------------------------------------------------------------------------------------------------------------------------------------------------------------------------------------------------------------------------------------------------------------------------------------------------------------------------------------------------------------------------|
|       |        |                               |                        | <p>gyrus ,R IFG, and R supramarginal gyrus for fearful faces; ↓ L pSTS, R IFG, bilateral dmPFC, and R SMA for sad; ↓ middle cingulate cortex, IFG, dmPFC and L angular gyrus to painful faces; ↑ aINS for painful faces</p> <p>Factor 1: ↓right middle occipital gyrus, bilateral IFG,R vmPFC, L OFC and R inferior temporal pole for happy faces; ↓ L insula, R vmPFC, OFC and R SMA for fearful faces; ↓ L IFG and R middle frontal gyrus for sad faces; ↓ R angular gyrus and L pSTS for painful faces; ↑ L postcentral gyrus and R precentral gyrus for painful faces</p> <p>Factor 2: ↓ right supramarginal gyrus and R SMA for happy faces; ↓R INS, L IFG, L middle frontal gyrus, and L SMA for fearful faces; ↓ L FG, left IFG and L inferior temporal pole for sad; ↓R STS, dorsal ACC, and striatum for painful faces;</p> |

| Study               | Sample                                                                       | Psychopathy measure/scores             | Task/Emotional stimuli                                                                                                                                                               | Association with psychopathy                                                                                                                                                                                                                                                                                                                                                                                                                                          |
|---------------------|------------------------------------------------------------------------------|----------------------------------------|--------------------------------------------------------------------------------------------------------------------------------------------------------------------------------------|-----------------------------------------------------------------------------------------------------------------------------------------------------------------------------------------------------------------------------------------------------------------------------------------------------------------------------------------------------------------------------------------------------------------------------------------------------------------------|
|                     |                                                                              |                                        |                                                                                                                                                                                      | <p>Total high vs. low: ↓ bilateral FG, dmPFC, inferior temporal pole, and R middle frontal gyrus for fearful faces</p> <p>Factor 1 high vs. low: ↑R INS for fearful faces; ↑left aINS and L middle cingulate gyrus to sad faces</p>                                                                                                                                                                                                                                   |
| Deeley et al., 2006 | N total = 15 M; offenders (n = 6; age = 36.0±9.0) HC (n = 9, age = 27.0±5.0) | PCL-R total (offenders)                | Implicit emotion recognition task (fearful, happy and neutral faces)                                                                                                                 | <p>↓ bilateral cerebellum and FG, L postcentral gyrus for fearful faces (vs. HC)</p> <p>↑ R INS and precuneus, ↓ cerebellum and FG for fearful faces (vs. neutral)</p> <p>↓ R FG, L lingual gyrus, cerebellum and precentral gyrus for happy faces (vs. HC)</p> <p>↑ R cerebellum, bilateral FG and middle occipital gyrus, R precuneus, anterior cingulate gyrus, medial frontal gyrus, L superior parietal lobule and precuneus for fearful faces (vs. neutral)</p> |
| Gordon et al., 2004 | N total = 20 community M; age = 23.5±4.1                                     | PPI total and subscales (whole sample) | <p>Explicit affect recognition task (angry, fearful, sad, and joyful faces)</p> <p>Emotion recognition condition and identity condition (which emotion is vs. who the person is)</p> | <p>↓ R inferior frontal cortex, R AMY and mPFC ↑ visual cortex (Emotional Interpersonal subscale)</p> <p>↑ R AMY in emotion recognition condition (Social Deviance subscale)</p>                                                                                                                                                                                                                                                                                      |

| Study                       | Sample                                                                                                      | Psychopathy measure/scores               | Task/Emotional stimuli                                                                                                                                          | Association with psychopathy                                                                                                                                                                                                                                                           |
|-----------------------------|-------------------------------------------------------------------------------------------------------------|------------------------------------------|-----------------------------------------------------------------------------------------------------------------------------------------------------------------|----------------------------------------------------------------------------------------------------------------------------------------------------------------------------------------------------------------------------------------------------------------------------------------|
|                             |                                                                                                             |                                          |                                                                                                                                                                 | ↓ mPFC in emotion recognition condition (total score)                                                                                                                                                                                                                                  |
| Mier et al., 2014           | N total = 29 M; inmates (n = 11, age = 44.6±9.0); HC (n = 18, age = 44.0±10.4)                              | PCL-R total (inmates); PPI-R total (HC)  | Explicit recognition of emotions (happy, angry, fearful and neutral faces):<br>Affective Theory of Mind (ToM),<br>Emotion recognition & Neutral face conditions | ↓ R FG for all faces<br>↓ R FG and L AMY (affective ToM task)                                                                                                                                                                                                                          |
| Pera-Guardiola et al., 2016 | N total = 39 M; criminal offenders (n = 19; age = 39.2±8.9); healthy non-offenders (n = 20; age = 40.6±9.9) | PCL-R total and subscales (whole sample) | Explicit facial emotion expression recognition task (gradually morphed happy, surprised, fearful, sad, disgustful and angry faces)                              | ↑ volume of dmPFC for better sad faces recognition; and middle ACC, aINS, IFG, OFC and anterior cerebellum for better happy faces recognition; and somatosensory cortex for better fearful faces recognition<br>↑volume of dmPFC for better recognition of all faces (Lifestyle facet) |
| <b>EEG</b>                  |                                                                                                             |                                          |                                                                                                                                                                 |                                                                                                                                                                                                                                                                                        |
| Almeida et al., 2014        | N total = 54 community M; age = 23.2±3.8                                                                    | PPI-R total and subscales (whole sample) | Explicit recognition of emotions (angry, fearful, disgustful, happy, neutral and calm faces, varying spatial frequency content)                                 | ↓ N170 amplitude for facial expressions (Fearless dominance subscale)<br>↑ N170 amplitude for fearful and happy faces (Coldheartedness subscale)                                                                                                                                       |
| Brislin & Patrick, 2019     | N total = 127; M (n = 62); F (n = 65); age = 19.5±3.7                                                       | TriPM total and subscales (whole sample) | Explicit recognition of emotions (angry, disgustful, fearful, happy, sad and surprised faces, with different intensities)                                       | ↓ L and R N170 amplitude for fearful faces; ↓ P200 amplitude for fearful faces; and ↓ LPP amplitude to fearful and sad faces (Meanness subscale)                                                                                                                                       |

| Study                   | Sample                                                                                                      | Psychopathy measure/scores               | Task/Emotional stimuli                                                                                                                                          | Association with psychopathy                                                                                                                                                                    |
|-------------------------|-------------------------------------------------------------------------------------------------------------|------------------------------------------|-----------------------------------------------------------------------------------------------------------------------------------------------------------------|-------------------------------------------------------------------------------------------------------------------------------------------------------------------------------------------------|
|                         |                                                                                                             |                                          |                                                                                                                                                                 | ↑ L N170 amplitude for fearful faces (Disinhibition subscale)                                                                                                                                   |
| Eisenbarth et al., 2013 | N total = 23 F forensic patients; M = 37.0±8.8                                                              | PCL-R total and subscales (whole sample) | Implicit recognition of emotions (fearful, angry, and happy faces); Viewing of emotions (positive, negative and neutral)                                        | N170, P3 and LPP amplitudes: n.s.<br>↓ N2 amplitude for angry and fearful faces (F2)                                                                                                            |
| Munro et al., 2007      | N total = 30 M; violent offenders (n = 15, age = 45.9±3.5); HC (n = 15, age = 46.6±1.8)                     | PCL-R total (violent offenders)          | Explicit emotion recognition: Face flanker task (angry and fearful faces) and letter flanker task                                                               | ↓ ERN negative amplitude during face flanker task (in violent offenders)                                                                                                                        |
| <b>Eye-gazing</b>       |                                                                                                             |                                          |                                                                                                                                                                 |                                                                                                                                                                                                 |
| Dargis et al., 2018     | N = 198 M inmates; age = 18-55                                                                              | PCL-R total and subscales (whole sample) | Explicit recognition of emotions (happy, sad, angry, fearful, disgustful, and neutral faces) and viewing of emotions (happy, angry, fearful, and neutral faces) | ↓ fixations on eyes of fearful faces (Interpersonal facet)<br>↑ fixations on eyes of fearful faces (Antisocial facet)<br>↓ fixations on eyes of fearful faces during free viewing (total score) |
| Gehrer et al., 2019     | N total = 36 M; psychopathic (n = 19, age = 40.3±11.1); non-psychopathic offenders (n = 17, age = 37.4±9.0) | PCL-R total (whole sample)               | Explicit recognition of emotions & gender (angry, disgustful, happy, fearful, sad, surprised and neutral faces)                                                 | ↓ dwell time on eyes overall (in psychopathic offenders)                                                                                                                                        |
| Gillespie et al., 2017  | N total = 55 M; violent offenders (n = 30; age =                                                            | TriPM subscales (whole sample)           | Explicit recognition of emotions (morphed angry, disgustful, fearful,                                                                                           | ↓ dwell time and fixations on the eyes overall (Boldness subscale)                                                                                                                              |

| Study                  | Sample                                                          | Psychopathy measure/scores               | Task/Emotional stimuli                                                                                                                                               | Association with psychopathy                                                                                        |
|------------------------|-----------------------------------------------------------------|------------------------------------------|----------------------------------------------------------------------------------------------------------------------------------------------------------------------|---------------------------------------------------------------------------------------------------------------------|
|                        | 35.1±11.8; community people<br>(n = 25; age = 37.9±18.3)        |                                          | happy, sad and surprised faces, with different intensities)                                                                                                          |                                                                                                                     |
| Gillespie et al., 2015 | N = 38 community M; age = 23.2±4.9                              | LSRP subscales (whole sample)            | Explicit recognition of emotions (morphed angry, disgustful, fearful, happy, sad and surprised faces, with different intensities)                                    | ↓ dwell time and fixations on the eyes of angry and fearful faces (Primary psychopathy scale)                       |
| Mowle et al., 2019     | N total = 110 community; M (n = 36); F (n = 74); age 18-19      | TriPM total and subscales (whole sample) | Explicit recognition of emotions (fearful, happy, sad, angry, surprised, calm, neutral, and disgustful faces)                                                        | Fixation on facial features: n.s.                                                                                   |
| <b>Pupillometry</b>    |                                                                 |                                          |                                                                                                                                                                      |                                                                                                                     |
| Burley et al., 2017    | N total = 102 community M (n = 50); F (n = 52); age = 21.1±3.6  | TriPM total and subscales (whole sample) | Implicit recognition of emotions (unpleasant, pleasant and neutral); Static & dynamic expressions viewing (fearful, happy, neutral, disgustful, angry and sad faces) | n.s.                                                                                                                |
| Burley et al., 2019    | N total = 82 M forensic psychiatric inpatients; age = 38.6±12.8 | PCL-R total and subscales (whole sample) | Implicit emotion recognition of static & dynamic emotional expressions (fearful, happy, neutral, disgustful, angry and sad faces)                                    | ↓ dilation for angry faces (Interpersonal facet)<br>↑ dilation for happy faces (Interpersonal and Affective facets) |
| Gillespie et al., 2019 | N total = 73 M violent offenders; age = 38.7±11.7               | TriPM total and subscales (whole sample) | Explicit recognition of emotions (morphed neutral, angry, disgustful, fearful, happy, sad, and surprised faces with different levels of intensity)                   | ↓ pupil dilation for fearful, happy and sad faces (Meanness subscale)                                               |

*Note.* PCL-R = Psychopathy Checklist – Revised; PCL:SV = Psychopathy Checklist: Screening Version; PPI = Psychopathic Personality Inventory; PPI-R = Psychopathic Personality Inventory – Revised TriPM = Triarchic Psychopathy Measure; LSRP = Levenson’s Self-Report Psychopathy Scale; SRP = Self-Report Psychopathy Scale; SRP-III = Self-Report Psychopathy Scale – Third Version; SRP-SF = Self-Report Psychopathy Scale – Short Form; F1 = PCL-R’s Factor 1; F2 = PCL-R’s Factor 2; FG = fusiform gyrus; IFG = inferior frontal gyrus; OFC = orbitofrontal cortex; PFC = prefrontal cortex; mPFC = medial PFC; dmPFC = dorsomedial PFC; vmPFC = ventromedial PFC; SMA = supplementary motor area; INS = insula; aINS = anterior INS; STS = superior temporal sulcus; pSTS = posterior STS; ACC = anterior cingulate cortex; AMY = amygdala; GM = grey matter; ERN=error-related negativity; Pe = error positivity; LPP = late-positive potential; fMRI = functional magnetic imaging; EEG = electroencephalography; ERP = event-related potentials; M age=mean age; ↓ = lower; ↑ = higher; n.s. = non-significant; M = males; F = females; HC = healthy controls; R = right; L = left.
