# Supplementary material for: Psychophysiology of facial emotion recognition in psychopathy dimensions and oxytocin’s role: A scoping review
Source: PLOS journal article supplement (doi:10.1371/journal.pone.0327764), 2025-07-30
Supplement: S6 (10.1371/journal.pone.0327764.s006) [file journal.pone.0327764.s006.pdf]

**S4 Table. Studies on the effect of oxytocin intranasal administration or endogenous level on facial emotion recognition performance and functional central and peripheral nervous system correlates**

| Study                      | Sample                                                                                                        | Intervention/Levels | Design                                        | Task/Stimuli                                                                                                                                                                           | Association with oxytocin                                                                                                                                        |
|----------------------------|---------------------------------------------------------------------------------------------------------------|---------------------|-----------------------------------------------|----------------------------------------------------------------------------------------------------------------------------------------------------------------------------------------|------------------------------------------------------------------------------------------------------------------------------------------------------------------|
| <b>Behavior (accuracy)</b> |                                                                                                               |                     |                                               |                                                                                                                                                                                        |                                                                                                                                                                  |
| Campbell et al., 2014      | N total = 68; 34 old M (n = 17); F (n = 17); age = 72.1±6.5); 34 young M (n = 17); F (n = 17); age = 19.7±1.8 | 20 IU in-OT         | Double blind, PL-controlled, between-subjects | Explicit recognition of emotions (angry, disgustful, fearful, happy, sad, and neutral)                                                                                                 | ↑ accuracy for older males (vs. younger males, younger females and older females)                                                                                |
| Di Simplicio et al., 2009  | N total = 29 M; PL (n = 15) age = 23.1±2.7; in-OT (n = 14); age = 24.3±3.4                                    | 24 IU in-OT         | Double blind, PL-controlled, between-subjects | Explicit recognition of emotions (morphed angry, disgustful, fearful, happy, sad and surprised faces with different intensities); Cambridge face memory test; Attentional visual probe | ↑ response time for fearful faces (vs. PL)<br>↓ misclassification of surprised faces as a disgustful or sad expression, and neutral as a sad expression (vs. PL) |
| Domes et al., 2013a        | N total = 62 M; age = 24.0±2.5                                                                                | 24 IU in-OT         | Double blind, PL-controlled, between-subjects | Explicit recognition of dynamic emotions (neutral to happy and angry faces); early exploration phase and                                                                               | ↑ response time for happy faces (vs. PL)                                                                                                                         |

| Study               | Sample                         | Intervention/Levels | Design                                        | Task/Stimuli                                                                                                                                                                      | Association with oxytocin             |
|---------------------|--------------------------------|---------------------|-----------------------------------------------|-----------------------------------------------------------------------------------------------------------------------------------------------------------------------------------|---------------------------------------|
|                     |                                |                     |                                               | emotion recognition phase                                                                                                                                                         |                                       |
| Feeser et al., 2014 | N total = 82 M; age = 27.9±4.7 | 24 IU in-OT         | Double blind, PL-controlled, between-subjects | Explicit recognition of emotions (fearful, angry, disgustful, sad, happy, surprised and neutral)                                                                                  | ↑ accuracy for fearful faces (vs. PL) |
| Gamer et al., 2010  | N total = 46 M; age = 25±3.7   | 24 IU in-OT         | Double blind, PL-controlled, between-subjects | Explicit recognition of emotions (fearful, happy and neutral faces, downward of upward of fixation cross, such that eyes or mouth appeared at the location of the fixation cross) | Accuracy and response time: n.s.      |
| Kanat et al., 2014  | N total = 49 M; age = 23.6±2.8 | 24 IU in-OT         | Double blind, PL-controlled, between-subjects | Explicit recognition of emotions (angry, happy and neutral faces, followed by a masked face); short stimulus or long stimulus presentation                                        | Accuracy and response time: n.s.      |

| Study                | Sample                                             | Intervention/Levels | Design                                                            | Task/Stimuli                                                                                                                                                      | Association with oxytocin                                                                             |
|----------------------|----------------------------------------------------|---------------------|-------------------------------------------------------------------|-------------------------------------------------------------------------------------------------------------------------------------------------------------------|-------------------------------------------------------------------------------------------------------|
| Kis et al., 2013     | N total = 56 M; age = 23.0±3.3                     | 24 IU in-OT         | Double blind (half single-blind), PL-controlled, Between-subjects | Explicit recognition of emotions (happy, neutral, angry and fearful faces); Valence rating (positive or negative)                                                 | ↑ positive bias in negative emotions recognition (vs. PL)                                             |
| Leknes et al., 2013  | N total = 40; M (n = 20); F (n = 20); age = 26     | 40 IU in-OT         | Double blind, PL-controlled, crossover                            | Explicit recognition of emotions: Implicitly “hybrid” (happy-neutral and angry-neutral faces) and explicit angry and happy faces; concomitant tactile stimulation | ↑ recognition accuracy for angry and happy faces (vs. PL)                                             |
| Lischke et al., 2012 | N total = 47 M; age = 26.1±3.4                     | 24 IU in-OT         | Double blind, PL-controlled, between-subjects                     | Explicit recognition of dynamic emotions (neutral to happy, angry, sad and fearful faces)                                                                         | ↓ recognition threshold for angry faces (vs. PL)<br>↑ recognition accuracy for fearful faces (vs. PL) |
| Marsh et al., 2010   | N total = 50 M (n = 29) and F (n = 21); age = 26.4 | 24 IU in-OT         | Double blind, PL-controlled, between-subjects                     | Explicit recognition of emotions (morphed angry, disgustful, fearful, happy, sad and surprised faces with different intensities)                                  | Response time: n.s.<br>↑ accuracy for happy faces (in males and females) (vs. PL)                     |

| Study                  | Sample                                                                                   | Intervention/Levels | Design                                                | Task/Stimuli                                                                                                                                       | Association with oxytocin                                                                                                                               |
|------------------------|------------------------------------------------------------------------------------------|---------------------|-------------------------------------------------------|----------------------------------------------------------------------------------------------------------------------------------------------------|---------------------------------------------------------------------------------------------------------------------------------------------------------|
| Matsunaga et al., 2020 | N total = 51 F;<br>primiparous mothers,<br>breastfeeding 2- to 9-<br>month-old infants   | Salivary OT         | N.A.                                                  | Explicit recognition of<br>emotions (neutral, angry<br>and happy faces);<br>previous breastfeeding<br>vs. holding the infant                       | ↑ accuracy for happy<br>faces (vs. angry) in<br>breastfeeding<br>Response time: n.s.<br>↓ accuracy for angry<br>faces (vs. neutral) in<br>breastfeeding |
| Peltola et al., 2018   | N total = 52 mothers;<br>mothers (age =<br>31.9±5.0); infants (age<br>= 14.5±1.2 months) | 24 IU in-OT         | Double blind, PL-<br>controlled, within-<br>subjects  | Explicit recognition of<br>emotions (happy and<br>sad/distressed adult and<br>infant faces)                                                        | Response time: n.s.                                                                                                                                     |
| Perry et al., 2013     | N total = 30; M (n =<br>19); F (n = 11); age =<br>38.9±10.6                              | 24 IU in-OT         | Double blind, PL-<br>controlled, within-<br>subjects  | Explicit recognition of<br>emotions: disgustful<br>faces placed on body<br>images in emotional<br>contexts (disgustful,<br>angry, sad and fearful) | Response time: n.s.<br>↑ accuracy of disgustful<br>faces in the angry body<br>context (vs. PL)                                                          |
| Prehn et al., 2013     | N total = 47 M; age =<br>26.1±3.4                                                        | 24 IU in-OT         | Double blind, PL-<br>controlled, between-<br>subjects | Explicit dynamic<br>recognition of emotions<br>(neutral to happy, angry,<br>sad and fearful faces)                                                 | Accuracy: n.s.<br>↓ recognition threshold<br>for angry faces (vs. PL)                                                                                   |

| Study                  | Sample                          | Intervention/Levels           | Design                                               | Task/Stimuli                                                                                                                                      | Association with oxytocin                                                                                               |
|------------------------|---------------------------------|-------------------------------|------------------------------------------------------|---------------------------------------------------------------------------------------------------------------------------------------------------|-------------------------------------------------------------------------------------------------------------------------|
| Quintana et al., 2019b | N total = 57 M; age = 23.8±3.3  | 8 IU, 24 IU in-OT; 1 IU iv-OT | Double blind, double-dummy, PL-controlled, crossover | Explicit recognition of emotions (happy, angry and neutral/ambiguous faces; shapes of different colors);<br>Emotional ratings (emotion intensity) | Emotional ratings: n.s.                                                                                                 |
| Quintana et al., 2016  | N total = 57 M; age = 18-35     | 8 IU, 24 IU in-OT; 1 IU iv-OT | Double blind, double-dummy, PL-controlled, crossover | Explicit recognition of emotions (happy, angry and neutral/ambiguous faces; shapes of different colors); Emotional ratings (emotion intensity)    | Emotional ratings: n.s.                                                                                                 |
| Schulze et al., 2011   | N total = 56 M; age = 24.3±3.1  | 24 IU in-OT                   | Double blind, PL-controlled, between-subjects        | Explicit recognition of emotions (angry, happy and neutral faces intercalated with a masked neutral face)                                         | ↑ accuracy for emotional regardless of valence and presentation time (vs. PL)<br>↑ accuracy for happy faces (vs. angry) |
| Spengler et al., 2017  | N total = 116 M; age = 24.7±4.4 | 12 IU, 24 IU, 48 IU in-OT     | Double blind, PL-controlled, crossover               | Explicit recognition of emotions (morphed fearful, happy and                                                                                      | ↓ Emotional bias in the recognition of neutral (vs. PL)                                                                 |

| Study                      | Sample                                                                      | Intervention/Levels | Design                                        | Task/Stimuli                                                                                                  | Association with oxytocin                                                                   |
|----------------------------|-----------------------------------------------------------------------------|---------------------|-----------------------------------------------|---------------------------------------------------------------------------------------------------------------|---------------------------------------------------------------------------------------------|
|                            |                                                                             |                     |                                               | neutral faces with different intensities and initial fixation – mouth vs. eyes)                               |                                                                                             |
| Tollenaar et al., 2013     | N total = 20 M; age = 21±3                                                  | 24 IU in-OT         | Double blind, PL-controlled, crossover        | Implicit emotional gaze cueing task (happy, neutral and fearful faces)                                        | ↑ gaze cued orienting of attention for happy and fearful faces (vs. PL)                     |
| Van der Donck et al., 2022 | N total = 31 M; age = 22.8±2.4                                              | 24 IU in-OT         | Double blind, PL-controlled, crossover        | Implicit emotional face-matching task (angry, happy, disgustful, sad, fearful, and surprised faces)           | Accuracy: n.s.<br>Response time: n.s.                                                       |
| <b>fMRI</b>                |                                                                             |                     |                                               |                                                                                                               |                                                                                             |
| Domes et al., 2007         | N total = 13 M; age = 25.7±2.9                                              | 24 IU in-OT         | Double blind, PL-controlled, within-subjects  | Implicit recognition of emotions (morphed happy, fearful, angry and neutral faces with different intensities) | ↓ R AMY for all emotions (vs. PL)                                                           |
| Kanat et al., 2015         | N total = 43 M; PL (n = 21); age = 23.9±2.7; in-OT (n = 22); age = 24.3±3.4 | 24 IU in-OT         | Double blind, PL-controlled, between-subjects | Implicit emotional recognition task (masked fearful and happy eyes, followed by the target                    | ↓ R AMY for fearful masked eyes (vs. happy)<br>↓ L ACC and L mid-temporal gyrus for fearful |

| Study              | Sample                         | Intervention/Levels | Design                                        | Task/Stimuli                                                                                                                               | Association with oxytocin                                                                                                                                                                                                                                                                                                                                                                                                        |
|--------------------|--------------------------------|---------------------|-----------------------------------------------|--------------------------------------------------------------------------------------------------------------------------------------------|----------------------------------------------------------------------------------------------------------------------------------------------------------------------------------------------------------------------------------------------------------------------------------------------------------------------------------------------------------------------------------------------------------------------------------|
|                    |                                |                     |                                               | eyes in neutral faces; scrambled eye components as control stimuli)                                                                        | eyes (vs. happy) across stimuli                                                                                                                                                                                                                                                                                                                                                                                                  |
| Kanat et al., 2014 | N total = 49 M; age = 23.6±2.8 | 24 IU in-OT         | Double blind, PL-controlled, between-subjects | Explicit recognition of emotions (angry, happy and neutral faces, followed by a masked face); short stimulus or long stimulus presentation | <p>↓ bilateral AMY for eyes (vs. mouth) of masked angry faces, and for mouth (vs. eyes) of masked happy faces, in short stimulus</p> <p>↓ medial superior frontal gyrus for mouth (vs. eyes) of happy faces</p> <p>↓ inferior occipital regions, temporal part of the ventral stream and brainstem regions for eyes (vs. mouth) of masked angry faces for short stimuli</p> <p>↓ mid-temporal gyrus, superior colliculi, and</p> |

| Study                 | Sample                                         | Intervention/Levels           | Design                                               | Task/Stimuli                                                            | Association with oxytocin                                                                                                                                                                                                               |
|-----------------------|------------------------------------------------|-------------------------------|------------------------------------------------------|-------------------------------------------------------------------------|-----------------------------------------------------------------------------------------------------------------------------------------------------------------------------------------------------------------------------------------|
|                       |                                                |                               |                                                      |                                                                         | <p>striate to eyes (vs. mouth) of masked angry faces for long stimuli</p> <p>↓ L FG to eyes (vs. mouth) of masked angry faces for all stimuli</p> <p>↓ connectivity of L AMY with L FG to eyes of angry faces (vs. eyes of neutral)</p> |
| Ma et al., 2022       | N total = 65 F; nulliparous women; age = 18-26 | 24 IU in-OT                   | Double blind, PL-controlled, between-subjects        | Implicit recognition of emotions (joy, neutral and crying infant faces) | <p>↓ R AMY and bilateral insula for crying faces (vs. PL) only in women with attachment anxiety</p> <p>↑ bilateral AMY and left inferior OFC for crying faces (vs. PL) only in women with attachment avoidance</p>                      |
| Quintana et al., 2016 | N total = 57 M; age = 18-35                    | 8 IU, 24 IU in-OT; 1 IU iv-OT | Double blind, double-dummy, PL-controlled, crossover | Explicit recognition of emotions (happy, angry and neutral/ambiguous    | ↓ a in R AMY for angry, happy and neutral faces as well shapes in 8 IU                                                                                                                                                                  |



| Study                 | Sample                                                                          | Intervention/Levels       | Design                                       | Task/Stimuli                                                                                                                                 | Association with oxytocin                                                                                         |
|-----------------------|---------------------------------------------------------------------------------|---------------------------|----------------------------------------------|----------------------------------------------------------------------------------------------------------------------------------------------|-------------------------------------------------------------------------------------------------------------------|
|                       |                                                                                 |                           |                                              | faces; shapes of different colors); Emotional ratings (emotion intensity)                                                                    | intervention condition (vs. PL)                                                                                   |
| Spengler et al., 2017 | N total = 116 M; age = 24.7±4.4                                                 | 12 IU, 24 IU, 48 IU in-OT | Double blind, PL-controlled, crossover       | Explicit recognition of emotions (morphed fearful, happy and neutral faces with different intensities and initial fixation – mouth vs. eyes) | ↓ a in L AMY for fearful faces, moderated by fear intensity (in 24 IU) (vs. PL)                                   |
| <b>EEG</b>            |                                                                                 |                           |                                              |                                                                                                                                              |                                                                                                                   |
| Peltola et al., 2018  | N total = 52 mothers; mothers (age = 31.9±5.0); infants (age = 14.5±1.2 months) | 24 IU in-OT               | Double blind, PL-controlled, within-subjects | Explicit recognition of emotions (happy and sad/distressed adult and infant faces)                                                           | ↑ N170 amplitude for infant (vs. adult) and sad faces (vs. happy)<br>↑ LPP amplitude for infant faces (vs. adult) |
| Tillman et al., 2019  | N total = 21 M; age = 25.2±3.7                                                  | 60 IU in-OT               | Double blind, PL-controlled, within-subjects | Experiment 1: Implicit dynamic faces recognition task (continuum neutral-fear or fear-neutral faces);                                        | ↑ N170 amplitude and ↓ latency for fearful faces (vs. neutral) (Experiment 1) ↓ latency for eyes (vs.             |

| Study                      | Sample                         | Intervention/Levels | Design                                        | Task/Stimuli                                                                                                                       | Association with oxytocin                                                                                                             |
|----------------------------|--------------------------------|---------------------|-----------------------------------------------|------------------------------------------------------------------------------------------------------------------------------------|---------------------------------------------------------------------------------------------------------------------------------------|
|                            |                                |                     |                                               | Experiment 2: Attention task (neutral faces and houses)                                                                            | mouth) overall (Experiment 2)<br>Non-significant effects on P100 and EPN amplitude or latency for each condition (Experiment 1 and 2) |
| Van der Donck et al., 2022 | N total = 31 M; age = 22.8±2.4 | 24 IU in-OT         | Double blind, PL-controlled, crossover        | Implicit recognition of emotions (angry, fear and happy faces)                                                                     | Neural sensitivity in occipito-temporal and medial-occipital regions through frequency-tagging EEG: n.s.                              |
| <b>Eye-gazing</b>          |                                |                     |                                               |                                                                                                                                    |                                                                                                                                       |
| Domes et al., 2013a        | N total = 62 M; age = 24.0±2.5 | 24 IU in-OT         | Double blind, PL-controlled, between-subjects | Explicit recognition of dynamic emotions (neutral to happy and angry faces); early exploration phase and emotion recognition phase | ↑ eye-gazing for neutral (early exploration phase) and ↑ eye-gazing overall (emotion recognition phase) (vs. PL)                      |

| Study                    | Sample                                         | Intervention/Levels | Design                                        | Task/Stimuli                                                                                                                                                                                                                               | Association with oxytocin                                          |
|--------------------------|------------------------------------------------|---------------------|-----------------------------------------------|--------------------------------------------------------------------------------------------------------------------------------------------------------------------------------------------------------------------------------------------|--------------------------------------------------------------------|
| Domes et al., 2013b      | N total = 69 M; age = 24.0±3.1                 | 24 IU in-OT         | Double blind, PL-controlled, between-subjects | Implicit recognition of emotions: Dot-probe paradigm (angry, happy and neutral faces); probe localization in congruent (same as the emotional face) or incongruent (same as the neutral) contexts; short and long duration of presentation | ↑ attention shift to happy faces (short duration) (vs. PL)         |
| Lischke et al., 2012     | N total = 47 M; age = 26.1±3.4                 | 24 IU in-OT         | Double blind, PL-controlled, between-subjects | Explicit recognition of dynamic emotions (neutral to happy, angry, sad and fearful faces)                                                                                                                                                  | ↑ eye-gazing for sad faces, recognized at lower intensity (vs. PL) |
| <b>Pupillometry</b>      |                                                |                     |                                               |                                                                                                                                                                                                                                            |                                                                    |
| Burley & Daughters, 2020 | N total = 94 M; age = 19.7±1.7                 | 24 IU in-OT         | Double blind, PL-controlled, mixed-design     | Explicit dynamic recognition of emotions (neutral to happy, sad, fearful and angry faces)                                                                                                                                                  | n.s.                                                               |
| Leknes et al., 2013      | N total = 40; M (n = 20); F (n = 20); age = 26 | 40 IU in-OT         | Double blind, PL-controlled, crossover        | Explicit recognition of emotions: Implicitly “hybrid” (happy-neutral                                                                                                                                                                       | ↑ pupil dilation for participants with low sensitivity (vs. high)  |

| Study                                       | Sample                         | Intervention/Levels | Design                                                  | Task/Stimuli                                                                                    | Association with oxytocin                                                                                                                                                                    |
|---------------------------------------------|--------------------------------|---------------------|---------------------------------------------------------|-------------------------------------------------------------------------------------------------|----------------------------------------------------------------------------------------------------------------------------------------------------------------------------------------------|
|                                             |                                |                     |                                                         | and angry-neutral faces)<br>and explicit angry and happy faces; concomitant tactile stimulation | towards differences between the implicit angry and happy faces<br>↑ stimulus-induced pupil dilation overall (vs. PL)                                                                         |
| Prehn et al., 2013                          | N total = 47 M; age = 26.1±3.4 | 24 IU in-OT         | Double blind, PL-controlled, between-subjects           | Explicit dynamic recognition of emotions (neutral to happy, angry, sad and fearful faces)       | ↑ pupil dilation to happy faces and male faces (vs. female) (vs. PL)                                                                                                                         |
| <b>fMRI with eye-gazing or pupillometry</b> |                                |                     |                                                         |                                                                                                 |                                                                                                                                                                                              |
| Domes et al., 2010                          | N total = 16 F; age = 24.2±2.5 | 24 IU in-OT         | Double blind, PL-controlled, within-subjects, crossover | Implicit recognition of emotions (angry, fearful, happy and neutral faces)                      | Fixation pattern: n.s.<br>↑ bilateral FG, L STG and L AMY for fearful faces (vs. neutral)<br>↑ bilateral IFG for angry faces (vs. neutral)<br>↑ L FG and R IFG for happy faces (vs. neutral) |
| Gamer et al., 2010                          | N total = 46 M; age = 25±3.7   | 24 IU in-OT         | Double blind, PL-controlled, between-subjects           | Explicit recognition of emotions (fearful, happy and neutral faces, downward of upward of       | ↓ L AMY for fearful faces and ↑ L AMY for happy faces (vs. PL)                                                                                                                               |

| Study                  | Sample                         | Intervention/Levels           | Design                                               | Task/Stimuli                                                                                                                                   | Association with oxytocin                                                                                                                                                                                                                     |
|------------------------|--------------------------------|-------------------------------|------------------------------------------------------|------------------------------------------------------------------------------------------------------------------------------------------------|-----------------------------------------------------------------------------------------------------------------------------------------------------------------------------------------------------------------------------------------------|
|                        |                                |                               |                                                      | fixation cross, such that eyes or mouth appeared at the location of the fixation cross)                                                        | <p>↑ eye-gazing irrespective of emotion (vs. PL)</p> <p>Positive correlation between eye-gazing and R posterior AMY irrespective of emotion (vs. PL)</p> <p>↑ connectivity between AMY and superior colliculus when gaze-related (vs. PL)</p> |
| Quintana et al., 2019b | N total = 57 M; age = 23.8±3.3 | 8 IU, 24 IU in-OT; 1 IU iv-OT | Double blind, double-dummy, PL-controlled, crossover | Explicit recognition of emotions (happy, angry and neutral/ambiguous faces; shapes of different colors); Emotional ratings (emotion intensity) | <p>↓ pupil dilation overall (in 8 IU) (vs. PL)</p> <p>Positive correlation between R AMY and pupil dilation for angry, neutral, happy faces and shapes (in 8 IU) (vs. PL)</p>                                                                 |

*Note.* OT = oxytocin; in-OT = intranasal OT; IU = international units; iv-OT = intravenous OT; PL = placebo; AMY = amygdala; ACC = anterior cingulate cortex; FG = fusiform gyrus; STG = superior temporal gyrus; IFG = inferior frontal gyrus; EPN = earlier posterior negativity; INS = insula; OFC = orbitofrontal cortex; M age = mean age; ↓ = lower; ↑ = higher; n.s. = non-significant; M = males; F = females; R = right; L = left.
