# Supplementary material for: Psychophysiology of facial emotion recognition in psychopathy dimensions and oxytocin’s role: A scoping review
Source: PLOS journal article supplement (doi:10.1371/journal.pone.0327764), 2025-07-30
Supplement: S7 (10.1371/journal.pone.0327764.s007) [file journal.pone.0327764.s007.pdf]

**S5 Table. Quality scores for each study included in this review, assessed from 0 to 3 across the preestablished 12-criteria list**

| Study                                                                                                                                                       | Q1 | Q2 | Q3 | Q4 | Q5 | Q6 | Q7 | Q8  | Q9  | Q10 | Q11 | Q12 | General quality score |
|-------------------------------------------------------------------------------------------------------------------------------------------------------------|----|----|----|----|----|----|----|-----|-----|-----|-----|-----|-----------------------|
| <b>Studies on the association of psychopathy and facial emotion recognition performance and functional central and peripheral nervous system correlates</b> |    |    |    |    |    |    |    |     |     |     |     |     |                       |
| Almeida et al., 2014                                                                                                                                        | 2  | 3  | 2  | 2  | 0  | 3  | 3  | N/A | 3   | 2   | 2   | 3   | 75.8%                 |
| Beussink et al., 2020                                                                                                                                       | 1  | 3  | 2  | 1  | 0  | 2  | 3  | N/A | N/A | 1   | 3   | 3   | 63.3%                 |
| Brislin & Patrick, 2019                                                                                                                                     | 3  | 3  | 1  | 1  | 0  | 2  | 3  | N/A | 3   | 3   | 3   | 3   | 75.8%                 |
| Burley et al., 2017                                                                                                                                         | 3  | 3  | 1  | 1  | 3  | 3  | 3  | N/A | 3   | 3   | 3   | 3   | 87.9%                 |
| Burley et al., 2019                                                                                                                                         | 2  | 3  | 3  | 3  | 3  | 3  | 3  | N/A | 3   | 3   | 1   | 3   | 90.9%                 |
| Carré et al., 2013                                                                                                                                          | 3  | 3  | 2  | 1  | 0  | 3  | 3  | N/A | 3   | 3   | 3   | 3   | 81.8%                 |
| Contreras-rodríguez et al., 2014                                                                                                                            | 2  | 3  | 2  | 3  | 0  | 3  | 3  | N/A | 3   | 3   | 2   | 3   | 81.8%                 |
| Dargis et al., 2018                                                                                                                                         | 2  | 3  | 3  | 3  | 0  | 3  | 3  | N/A | 3   | 3   | 2   | 3   | 84.9%                 |
| Decety et al., 2014                                                                                                                                         | 2  | 3  | 2  | 3  | 0  | 3  | 2  | N/A | 2   | 2   | 3   | 2   | 72.7%                 |
| Deeley et al., 2006                                                                                                                                         | 3  | 3  | 3  | 2  | 0  | 3  | 1  | N/A | 2   | 3   | 2   | 3   | 75.8%                 |
| Dolan & Fullam, 2006                                                                                                                                        | 3  | 3  | 3  | 3  | 0  | 2  | 3  | N/A | N/A | 2   | 2   | 3   | 80%                   |
| Dolan & Fullam, 2004                                                                                                                                        | 3  | 3  | 3  | 3  | 0  | 3  | 3  | N/A | N/A | 2   | 2   | 3   | 83.3%                 |
| Eisenbarth et al., 2013                                                                                                                                     | 3  | 3  | 2  | 3  | 0  | 3  | 3  | N/A | 3   | 3   | 3   | 3   | 87.9%                 |
| Eisenbarth et al., 2008                                                                                                                                     | 1  | 3  | 3  | 3  | 0  | 3  | 3  | N/A | N/A | 2   | 3   | 3   | 80%                   |
| Faith et al., 2023                                                                                                                                          | 3  | 3  | 3  | 2  | 0  | 2  | 3  | N/A | N/A | 2   | 3   | 3   | 80%                   |

| Study                          | Q1 | Q2 | Q3 | Q4 | Q5 | Q6 | Q7 | Q8  | Q9  | Q10 | Q11 | Q12 | General quality score |
|--------------------------------|----|----|----|----|----|----|----|-----|-----|-----|-----|-----|-----------------------|
| Faith et al., 2022             | 2  | 3  | 1  | 2  | 1  | 2  | 2  | N/A | N/A | 2   | 2   | 3   | 66.7%                 |
| Gehrer et al., 2019            | 3  | 3  | 2  | 1  | 3  | 3  | 3  | N/A | 3   | 3   | 2   | 3   | 87.9%                 |
| Gillespie et al., 2019         | 2  | 3  | 2  | 3  | 0  | 3  | 3  | N/A | 3   | 3   | 3   | 3   | 84.9%                 |
| Gillespie et al., 2017         | 3  | 3  | 2  | 1  | 0  | 3  | 3  | N/A | 3   | 3   | 3   | 3   | 81.8%                 |
| Gillespie et al., 2015         | 2  | 3  | 1  | 1  | 0  | 2  | 3  | N/A | 3   | 3   | 3   | 3   | 72.7%                 |
| Glass & Newman, 2006           | 3  | 2  | 2  | 1  | 0  | 2  | 3  | N/A | N/A | 2   | 1   | 3   | 63.3%                 |
| Gordon et al., 2004            | 2  | 3  | 1  | 1  | 0  | 3  | 1  | N/A | 2   | 3   | 3   | 3   | 66.7%                 |
| Hansen et al., 2008            | 2  | 3  | 2  | 1  | 0  | 2  | 2  | N/A | N/A | 2   | 1   | 3   | 60%                   |
| Igoumenou et al., 2017         | 2  | 3  | 3  | 3  | 0  | 3  | 3  | N/A | N/A | 1   | 1   | 3   | 73.3%                 |
| Jusyte & Schöenberg, 2017      | 2  | 2  | 2  | 1  | 0  | 3  | 3  | N/A | N/A | 2   | 2   | 3   | 66.7%                 |
| Khvatskaya & Lenzenweger, 2016 | 3  | 3  | 3  | 3  | 0  | 3  | 3  | N/A | N/A | 3   | 1   | 3   | 83.3%                 |
| Kosson et al., 2002            | 3  | 2  | 3  | 3  | 0  | 2  | 1  | N/A | N/A | 2   | 2   | 3   | 70%                   |
| Kranefeld & Blickle, 2022      | 2  | 2  | 1  | 1  | 0  | 2  | 2  | N/A | N/A | 1   | 2   | 2   | 50%                   |
| Kuin et al., 2017              | 2  | 3  | 3  | 2  | 3  | 3  | 3  | N/A | N/A | 3   | 3   | 3   | 93.3%                 |
| Künecke et al., 2018           | 3  | 3  | 3  | 1  | 0  | 3  | 3  | N/A | N/A | 3   | 3   | 3   | 83.3%                 |
| Mier et al., 2014              | 2  | 3  | 3  | 3  | 0  | 3  | 1  | N/A | 3   | 3   | 2   | 3   | 78.8%                 |
| Mowle et al., 2019             | 2  | 2  | 2  | 2  | 0  | 2  | 3  | N/A | 3   | 2   | 1   | 3   | 66.7%                 |
| Munro et al., 2007             | 1  | 3  | 2  | 1  | 0  | 3  | 3  | N/A | 3   | 2   | 2   | 3   | 69.7%                 |
| Olderbak et al., 2018          | 1  | 3  | 2  | 1  | 0  | 3  | 3  | N/A | N/A | 2   | 3   | 3   | 70%                   |

| Study                                                                                                                                                                                            | Q1 | Q2 | Q3 | Q4 | Q5 | Q6 | Q7  | Q8  | Q9  | Q10 | Q11 | Q12 | General quality score |
|--------------------------------------------------------------------------------------------------------------------------------------------------------------------------------------------------|----|----|----|----|----|----|-----|-----|-----|-----|-----|-----|-----------------------|
| Oliver et al., 2015                                                                                                                                                                              | 3  | 3  | 2  | 2  | 0  | 3  | 3   | N/A | N/A | 3   | 1   | 3   | 76.7%                 |
| Pera-Guardiola et al., 2016                                                                                                                                                                      | 2  | 3  | 2  | 3  | 0  | 2  | 3   | N/A | 3   | 3   | 3   | 3   | 81.8%                 |
| Pham & Philippot, 2010                                                                                                                                                                           | 1  | 2  | 2  | 2  | 0  | 2  | 3   | N/A | N/A | 3   | 3   | 3   | 70%                   |
| Philipp-Wiegmann et al., 2017                                                                                                                                                                    | 3  | 3  | 3  | 2  | 0  | 2  | 2   | N/A | N/A | 1   | 2   | 3   | 70%                   |
| Schönenberg & Jusyte, 2014                                                                                                                                                                       | 3  | 3  | 2  | 1  | 0  | 3  | 3   | N/A | N/A | 1   | 1   | 3   | 66.7%                 |
| <b>Studies on the effect of oxytocin intranasal administration or endogenous level on facial emotion recognition performance and functional central and peripheral nervous system correlates</b> |    |    |    |    |    |    |     |     |     |     |     |     |                       |
| Burley & Daughters, 2020                                                                                                                                                                         | 2  | 3  | 2  | 1  | 0  | 3  | N/A | 3   | 3   | 2   | 3   | 3   | 75.8%                 |
| Campbell et al., 2014                                                                                                                                                                            | 2  | 3  | 2  | 1  | 0  | 2  | N/A | 3   | N/A | 1   | 1   | 3   | 60%                   |
| Di Simplicio et al., 2009                                                                                                                                                                        | 2  | 3  | 3  | 1  | 0  | 3  | N/A | 3   | N/A | 2   | 3   | 3   | 76.7%                 |
| Domes et al., 2013a                                                                                                                                                                              | 2  | 3  | 2  | 2  | 0  | 2  | N/A | 3   | 2   | 2   | 2   | 3   | 69.7%                 |
| Domes et al., 2013b                                                                                                                                                                              | 3  | 3  | 1  | 2  | 0  | 3  | N/A | 3   | 2   | 2   | 1   | 3   | 69.7%                 |
| Domes et al., 2010                                                                                                                                                                               | 2  | 3  | 1  | 1  | 0  | 3  | N/A | 3   | 3   | 3   | 3   | 3   | 75.8%                 |
| Domes et al., 2007                                                                                                                                                                               | 2  | 3  | 1  | 1  | 0  | 3  | N/A | 3   | 2   | 1   | 3   | 3   | 66.7%                 |
| Feeser et al., 2014                                                                                                                                                                              | 3  | 3  | 2  | 1  | 0  | 3  | N/A | 3   | N/A | 3   | 3   | 3   | 80%                   |
| Gamer et al., 2010                                                                                                                                                                               | 2  | 3  | 2  | 1  | 0  | 3  | N/A | 3   | 2   | 3   | 3   | 3   | 75.8%                 |
| Kanat et al., 2015                                                                                                                                                                               | 3  | 3  | 3  | 1  | 0  | 2  | N/A | 3   | 3   | 2   | 3   | 3   | 78.8%                 |
| Kanat et al., 2014                                                                                                                                                                               | 2  | 3  | 2  | 1  | 0  | 3  | N/A | 3   | 3   | 2   | 3   | 3   | 75.8%                 |
| Kis et al., 2013                                                                                                                                                                                 | 2  | 2  | 3  | 1  | 0  | 2  | N/A | 3   | N/A | 3   | 2   | 3   | 70%                   |

| Study                      | Q1 | Q2 | Q3 | Q4 | Q5 | Q6 | Q7  | Q8 | Q9  | Q10 | Q11 | Q12 | General quality score |
|----------------------------|----|----|----|----|----|----|-----|----|-----|-----|-----|-----|-----------------------|
| Leknes et al., 2013        | 2  | 2  | 2  | 1  | 0  | 2  | N/A | 3  | 3   | 2   | 1   | 3   | 63.6%                 |
| Lischke et al., 2012       | 2  | 2  | 2  | 1  | 0  | 2  | N/A | 3  | 3   | 2   | 1   | 3   | 63.6%                 |
| Ma et al., 2022            | 3  | 3  | 2  | 1  | 0  | 3  | N/A | 3  | 3   | 3   | 3   | 3   | 81.8%                 |
| Marsh et al., 2010         | 3  | 3  | 3  | 3  | 0  | 3  | N/A | 3  | N/A | 3   | 2   | 3   | 86.7%                 |
| Matsunaga et al., 2020     | 1  | 3  | 2  | 1  | 0  | 3  | N/A | 3  | N/A | 3   | 2   | 3   | 70%                   |
| Peltola et al., 2018       | 2  | 3  | 3  | 1  | 0  | 3  | N/A | 3  | 3   | 2   | 1   | 3   | 72.7%                 |
| Perry et al., 2013         | 2  | 2  | 1  | 1  | 0  | 2  | N/A | 3  | N/A | 2   | 2   | 3   | 60%                   |
| Prehn et al., 2013         | 2  | 3  | 2  | 2  | 0  | 3  | N/A | 3  | 3   | 3   | 1   | 3   | 75.8%                 |
| Quintana et al., 2019b     | 1  | 3  | 2  | 1  | 0  | 2  | N/A | 2  | 2   | 3   | 2   | 3   | 63.6%                 |
| Quintana et al., 2016      | 3  | 3  | 2  | 2  | 0  | 3  | N/A | 3  | 3   | 3   | 3   | 3   | 84.9%                 |
| Schulze et al., 2011       | 2  | 2  | 2  | 1  | 3  | 2  | N/A | 3  | N/A | 2   | 3   | 3   | 76.7%                 |
| Spengler et al., 2017      | 3  | 3  | 1  | 1  | 0  | 3  | N/A | 3  | 3   | 2   | 3   | 3   | 75.8%                 |
| Tillman et al., 2019       | 3  | 3  | 3  | 1  | 0  | 3  | N/A | 3  | 3   | 3   | 3   | 3   | 84.9%                 |
| Tollenaar et al., 2013     | 3  | 3  | 2  | 1  | 0  | 3  | N/A | 3  | N/A | 3   | 2   | 3   | 76.7%                 |
| Van der Donck et al., 2022 | 3  | 3  | 2  | 1  | 0  | 3  | N/A | 3  | 3   | 2   | 2   | 3   | 75.8%                 |

*Note.* **Q1.** Were the hypothesis and objectives of the study clearly described? **Q2.** Have the authors used methods that can test their hypothesis? **Q3.** Were the recruitment procedure and eligibility criteria for the participants clearly described (e.g., ethnicity, age range, gender, neuropsychiatric and other medical conditions, handedness)? **Q4.** Was there an effort to account for demographic or neuropsychological variability amongst participants (e.g., age, gender, handedness, IQ, level of education, smoking, alcohol/drug use and, for cases, duration of illness and medication status)? **Q5.** Did

the study include an a priori power calculation to define sample sizes? **Q6.** Was a valid cognitive task assigned to elicit the desired effects in the participants and it was clearly described? **Q7.** Was the assessment of psychopathy performed with valid measurement tools and clearly described, when applied? **Q8.** Were aspects related to oxytocin administration or measurement adequate and clearly described, when performed (e.g., dose, administration method, time of administration, laboratory technique for oxytocin quantification)? **Q9.** In studies with central and/or peripheral nervous system activity assessment, the technique, respective parameters and preprocessing were outlined? **Q10.** Was the statistical methodology clearly explained? **Q11.** Was a consensual statistical significance threshold set (i.e.,  $p < 0.05$  after correction for multiple comparisons)? **Q12.** Were effect sizes reported for significant results (e.g., Cohen's  $d$ , Pearson's correlation, odds ratio or risk ratios)?

The general quality of the study was obtained by dividing the sum of the 12 items' scores by the maximum sum applicable to each study. N/A = Not applicable
